# Supplementary material for: Vitamin D Alleviates Cadmium-Induced Inhibition of Chicken Bone Marrow Stromal Cells’ Osteogenic Differentiation In Vitro
Source: MDPI journal article supplement (doi:10.3390/ani13152544), 2023-08-07
Supplement: s1 [file s1]

**Origin blots**

**Figure 1C**

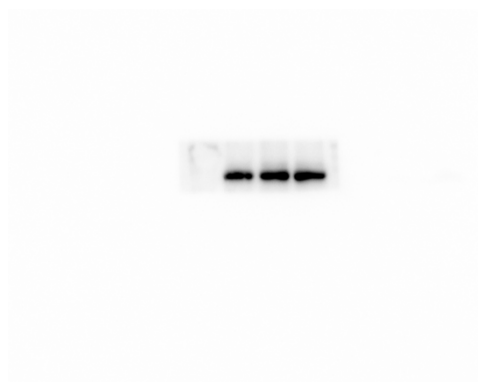

Col1 in Figure 1C

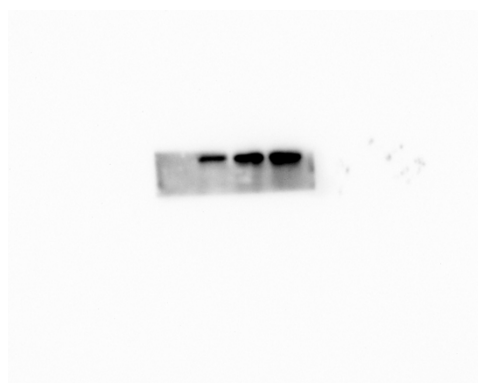

Runx2 in Figure 1C

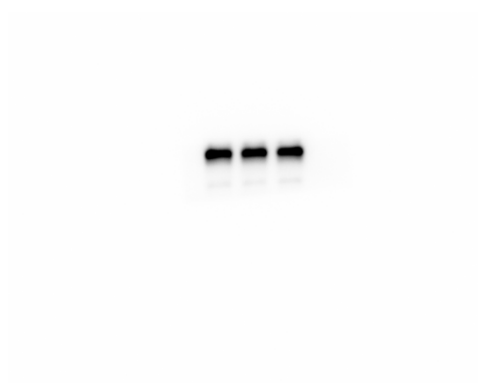

GAPDH in Figure 1C

**Figure 4B**

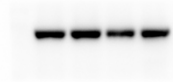

**Col1 in Figure 4B**

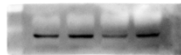

**Runx2 in Figure 4B**

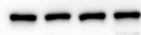

**GAPDH in Figure 4B**

**Figure 5C**

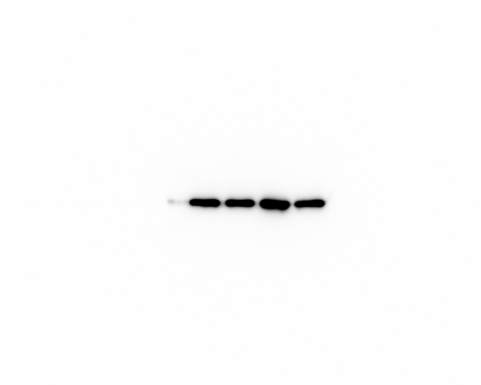

**Bax in Figure 5C**

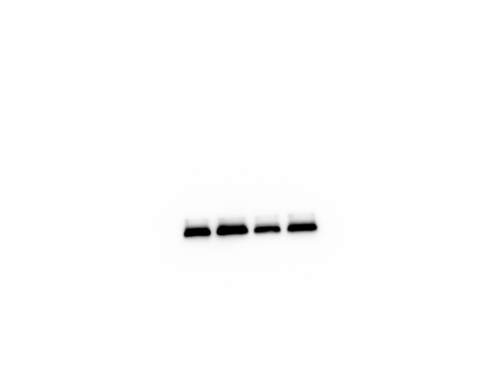

**Bcl-2 in Figure 5C**

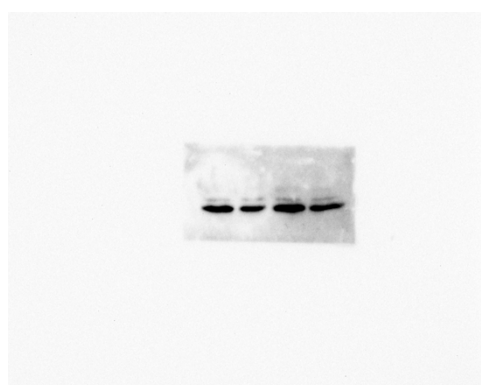

**Cleaved Caspase-3 in Figure 5C**

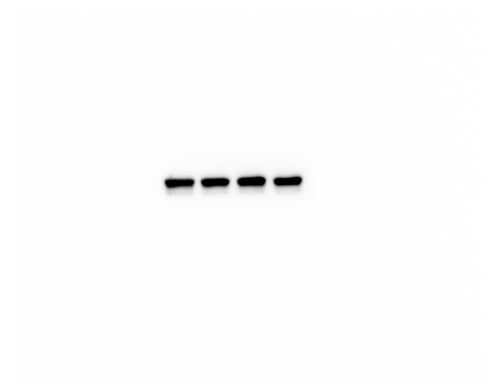

GAPDH in Figure 5C
